# Supplementary material for: Miocene Climatic Optimum and Middle Miocene Climate Transition: a foraminiferal record from the central Ross Sea, Antarctica
Source: Copernicus journal article supplement (doi:10.5194/jm-43-383-2024), 2024-09-19
Supplement: Supplementary file 1 [file jm-43-383-2024-supplement.pdf]

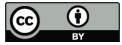

*Supplement of*

## **Miocene Climatic Optimum and Middle Miocene Climate Transition: a foraminiferal record from the central Ross Sea, Antarctica**

**Samantha E. Bombard et al.**

*Correspondence to:* Samantha E. Bombard ([sambombard@umass.edu](mailto:sambombard@umass.edu))

The copyright of individual parts of the supplement might differ from the article licence.

**Table S1. Site U1521 age model datums (Perex et al., 2021; Marschalek et al., 2021). Datums include Magnetic Polarity Reversals (MPR), Diatom First Appearance Datum (FAD), Diatom Last Appearance Datum (LAD), Diatom absence, unconformities, Sr of shells, and Ar of hornblende.**

| Depth mbsf | Depth Error | Event | Event Description              | Type         | Age (Ma) | Age Error | Reference                           |
|------------|-------------|-------|--------------------------------|--------------|----------|-----------|-------------------------------------|
| 65         |             |       | <i>Nitzschia denticuloides</i> | absence      | 13.6     |           | this study                          |
| 84.99      | 85.55       | A     | <i>Denticulopsis simonseni</i> | FAD          | 14.48    | 14.14     | Marschle et al (2021), 14.2 Ma used |
| 84.99      | 85.72       | B     | <i>Denticulopsis hyalina</i>   | FAD          | 14.76    | 14.73     | Marschle et al (2021)               |
| 84.99      | 85.55       | C     | <i>D. lauta</i>                | FAD          | 15.72    | 14.99     | Marschle et al (2021)               |
| 84.99      | 85.55       | D     | <i>A. ingens</i>               | FAD          | 15.83    | 15.52     | Marschle et al (2021)               |
| 85.34      |             |       | RSU4                           | Unconformity | 15.83    | 14.48     | Pérez et al (2021)                  |
| 105.9      | 0.4         | E     | C5Br/C5Cn.1n                   | MPR          | 15.994   |           | Marschle et al (2021)               |
| 141.92     |             | F     | Shell                          | Sr           | 16.039   | 0.25      | Marschle et al (2021)               |
| 145.135    |             | G     | Shell                          | Sr           | 16.211   | 0.24      | Marschle et al (2021)               |
| 145.135    |             | H     | Shell                          | Sr           | 16.272   | 0.24      | Marschle et al (2021)               |
| 182.7      |             | I     | Shell                          | Sr           | 16.117   | 0.25      | Marschle et al (2021)               |
| 182.71     |             | J     | Shell                          | Sr           | 16.319   | 0.23      | Marschle et al (2021)               |
| 183.825    |             | K     | Shell                          | Sr           | 16.071   | 0.25      | Marschle et al (2021)               |
| 184.215    |             | L     | Shell                          | Sr           | 16.196   | 0.24      | Marschle et al (2021)               |
| 184.215    |             | M     | Shell                          | Sr           | 16.149   | 0.25      | Marschle et al (2021)               |
| 196.785    |             | N     | Shell                          | Sr           | 16.257   | 0.24      | Marschle et al (2021)               |
| 207        | 2           | O     | C5Cn.1n/C5Cn.1r                | MPR          | 16.261   |           | Marschle et al (2021)               |
| 220.23     | 0.2         | P     | Hornblende                     | Ar           | 16.74    | 0.9       | Marschle et al (2021)               |
| 270.03     | 0.2         | Q     | Hornblende                     | Ar           | 17.08    | 1.2       | Marschle et al (2021)               |
| 272.65     |             | R     | Shell                          | Sr           | 16.304   | 0.23      | Marschle et al (2021)               |
| 286.1      |             | S     | <i>N. grosspunctata</i>        | FAD          | 15.94    | 15.87     | Marschle et al (2021)               |
| 286.1      |             | T     | <i>F. maleinterpretaria</i>    | LAD          | 16.41    | 15.5      | Marschle et al (2021)               |
| 286.1      |             | U     | <i>S. cheethamii</i>           | FAD          | 16.94    |           | Marschle et al (2021)               |
| 286.1      |             | V     | <i>D. maccollumili</i>         | FAD          | 17.05    | 16.77     | Marschle et al (2021)               |
| 286.1      |             | W     | <i>N. 17 Schrader</i>          | FAD          | 17.16    | 16.94     | Marschle et al (2021)               |
| 286.3      |             |       | C5Cn.1r/C5Cn.2n                | MPR          | 16.351   |           | Marschle et al (2021)               |
| 286.3      |             |       | RSU4a                          | Unconformity | 16.3     | 17        | Pérez et al (2021)                  |

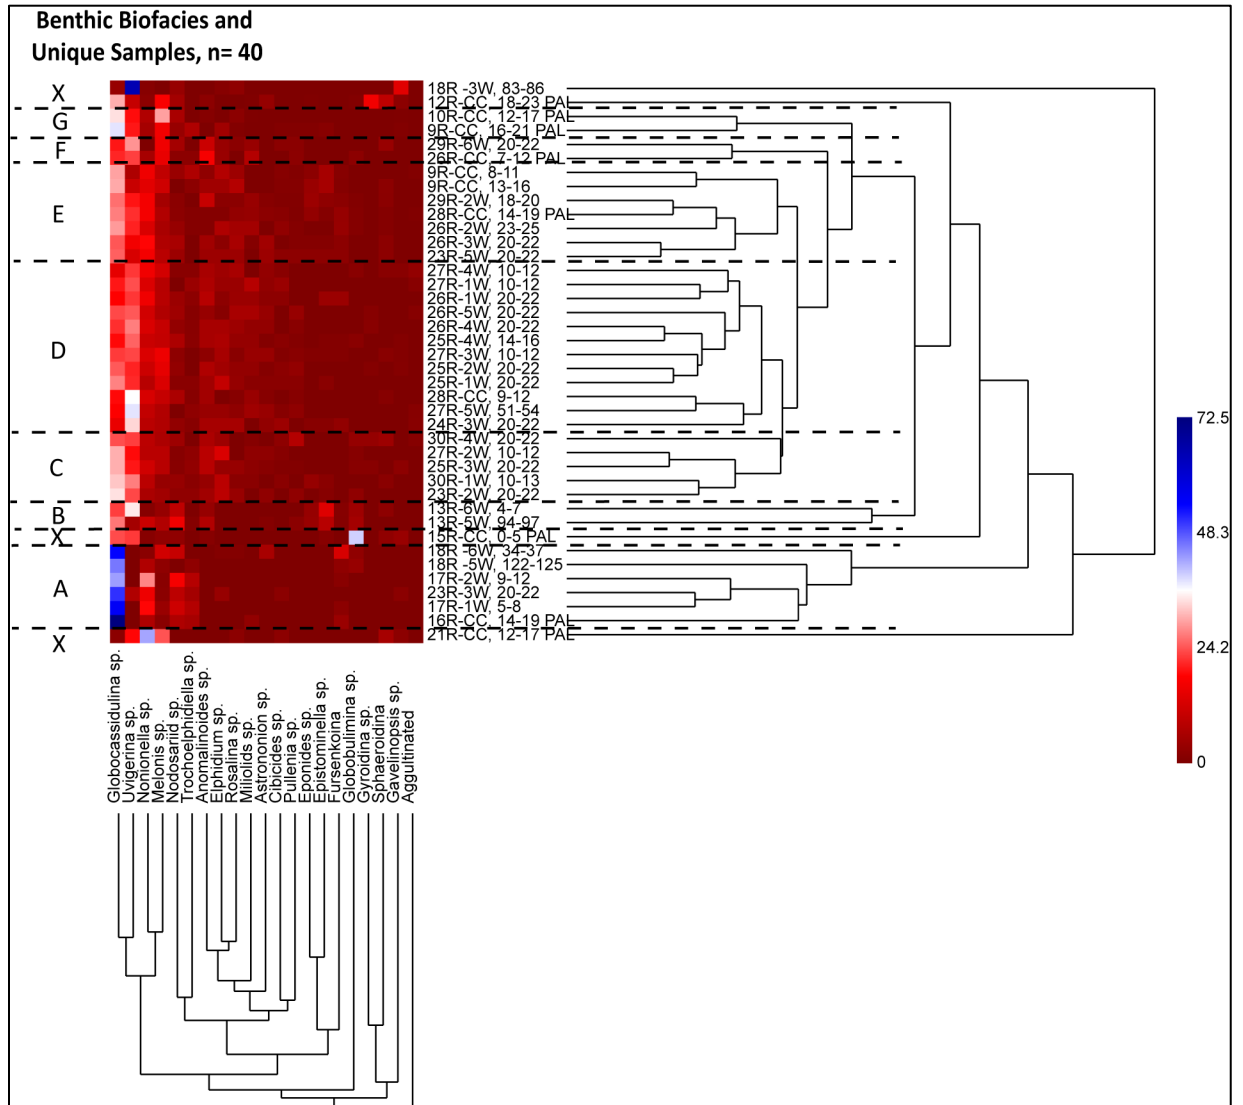

Figure S1. Q – R mode two-way cluster analysis for the 40 samples containing at least 48 benthic specimens. A-G denote benthic biofacies while X represents seven unique samples X1-X4.
